# Supplementary material for: Unravelling the Temporal and Chemical Evolution of a Mineralizing Fluid in Karst-Hosted Deposits: A Record from Goethite in the High Atlas Foreland (Morocco)
Source: MDPI journal article supplement (doi:10.3390/min12091151), 2022-09-11
Supplement: s1 [file s1]

# Unravelling the Temporal and Chemical Evolution of a Mineralizing Fluid in Karst-Hosted Deposits: A Record from Goethite in the High Atlas Foreland (Morocco)

Michèle Verhaert <sup>1,2</sup>, Cécile Gautheron <sup>2</sup>, Augustin Dekoninck <sup>1,\*</sup>, Torsten Vennemann <sup>3</sup>, Rosella Pinna-Jamme <sup>2</sup>, Abdellah Mouttaqi <sup>4</sup> and Johan Yans <sup>1</sup>

<sup>1</sup> Institute of Life-Earth-Sciences, Department of Geology, University of Namur, Rue de Bruxelles 61, 5000 Namur, Belgium

<sup>2</sup> Geosciences Paris Saclay (GEOPS), Université Paris Saclay, 91404 Orsay, France

<sup>3</sup> Institute of Earth Surface Dynamics, University of Lausanne, Géopolis, CH-1015 Lausanne, Switzerland

<sup>4</sup> Office National des Hydrocarbures et des Mines, Avenue Moulay Hassan 5, BP 99, Rabat 10000, Morocco

\* Correspondence: augustin.dekoninck@unamur.be

**Table S1.** Summary of information and performed analyses of Imini goethite.

| Sample number    | Description                   | Location |           | Elevation (m) | XRD | SEM | Geochemical analyses | Isotopic analyses | (U-Th)/He dating |
|------------------|-------------------------------|----------|-----------|---------------|-----|-----|----------------------|-------------------|------------------|
|                  |                               | Lat (°N) | Long (°W) |               |     |     |                      |                   |                  |
| <u>Far West</u>  |                               |          |           |               |     |     |                      |                   |                  |
| 18FAR02          | massive botryoidal goethite   | 31°2'29" | 7°27'57"  | 1711          | x   | x   | x                    | x                 | x                |
| 18FAR02A         | massive botryoidal goethite   | 31°2'29" | 7°27'57"  | 1711          | x   | x   | x                    | x                 | x                |
| 18FAR02B         | massive botryoidal goethite   | 31°2'29" | 7°27'57"  | 1711          | x   | x   |                      |                   |                  |
| 18FAR02C         | powdery hematite and goethite | 31°2'29" | 7°27'57"  | 1711          | x   |     | x                    |                   |                  |
| 18FAR03          | massive botryoidal goethite   | 31°2'29" | 7°27'57"  | 1711          | x   | x   |                      |                   |                  |
| 18FAR07X         | massive botryoidal goethite   | 31°1'12" | 7°28'6"   | 1739          | x   | x   | x                    |                   |                  |
| 18FAR15          | massive botryoidal goethite   | 31°1'12" | 7°28'6"   | 1739          | x   | x   |                      |                   |                  |
| 18FAR17          | botryoidal goethite           | 31°1'12" | 7°28'6"   | 1739          | x   | x   |                      |                   |                  |
| 18FAR18          | botryoidal goethite           | 31°1'12" | 7°28'6"   | 1739          | x   | x   |                      |                   |                  |
| <u>Tifersine</u> |                               |          |           |               |     |     |                      |                   |                  |
| 18TIF01          | massive botryoidal goethite   | 31°2'45" | 7°27'21"  | 1674          | x   | x   | x                    | x                 | x                |
| 18TIF05          | thin botryoidal goethite vein | 31°2'45" | 7°27'21"  | 1674          | x   | x   | x                    |                   |                  |
| 18TIF12          | mixed Mn oxides and goethite  | 31°2'27" | 7°27'18"  | 1654          | x   |     |                      |                   |                  |
| 18TIF16          | brechified goethite           | 31°2'27" | 7°27'18"  | 1654          | x   |     |                      |                   |                  |
| 18TIF20          | thin botryoidal goethite vein | 31°2'27" | 7°27'18"  | 1654          | x   | x   | x                    | x                 | x                |
| <u>Plateaux</u>  |                               |          |           |               |     |     |                      |                   |                  |
| 15PL02           | massive botryoidal goethite   | 31°1'35" | 7°29'31"  | 1763          | x   | x   | x                    | x                 | x                |
| 18PL02A          | powdery hematite and goethite | 31°1'27" | 7°29'3"   | 1766          | x   |     |                      |                   |                  |
| 18PL02B          | thin botryoidal goethite vein | 31°1'27" | 7°29'3"   | 1766          | x   | x   | x                    | x                 | x                |
| 18PL07           | massive botryoidal goethite   | 31°1'27" | 7°29'3"   | 1766          | x   | x   | x                    | x                 | x                |
| 18PL07B          | massive botryoidal goethite   | 31°1'27" | 7°29'3"   | 1766          | x   | x   |                      |                   |                  |
| 18PL20           | thin botryoidal goethite vein | 31°1'27" | 7°29'3"   | 1766          | x   | x   |                      |                   |                  |
| 18PL25           | thin botryoidal goethite vein | 31°1'27" | 7°29'3"   | 1766          | x   | x   | x                    | x                 | x                |
| 18PL27           | massive botryoidal goethite   | 31°1'27" | 7°29'3"   | 1766          | x   | x   | x                    |                   |                  |

Note: All samples are associated to Mn ores, and are hosted by Cenomanian-Turonian dolostones.

**Table S2.** Results of geochemical analyses for major elements (in wt.%).

| Sample number    | FeO  | SiO <sub>2</sub> | Al <sub>2</sub> O <sub>3</sub> | Fe <sub>2</sub> O <sub>3</sub> | MnO   | MgO  | CaO  | Na <sub>2</sub> O | K <sub>2</sub> O | TiO <sub>2</sub> | P <sub>2</sub> O <sub>5</sub> | LOI   | Total |
|------------------|------|------------------|--------------------------------|--------------------------------|-------|------|------|-------------------|------------------|------------------|-------------------------------|-------|-------|
| D.L.             | 0.1  | 0.01             | 0.01                           | 0.01                           | 0.001 | 0.01 | 0.01 | 0.01              | 0.01             | 0.001            | 0.01                          |       |       |
| <u>Far West</u>  |      |                  |                                |                                |       |      |      |                   |                  |                  |                               |       |       |
| 18FAR02          | <0.1 | 2.67             | 0.15                           | 84.55                          | 0.350 | 0.76 | 0.13 | 0.02              | <0.01            | <0.001           | 0.14                          | 11.24 | 100.0 |
| 18FAR02A         | <0.1 | 3.05             | 0.16                           | 82.79                          | 0.413 | 0.78 | 0.14 | 0.03              | <0.01            | 0.001            | 0.16                          | 11.63 | 99.2  |
| 18FAR02C         | <0.1 | 2.69             | 0.37                           | 87.02                          | 0.526 | 0.38 | 0.16 | 0.02              | 0.01             | 0.001            | 0.11                          | 7.50  | 98.8  |
| 18FAR07X         | <0.1 | 2.99             | 0.18                           | 82.73                          | 0.381 | 0.80 | 0.13 | 0.03              | <0.01            | <0.001           | 0.20                          | 11.65 | 99.1  |
| <u>Tifersine</u> |      |                  |                                |                                |       |      |      |                   |                  |                  |                               |       |       |
| 18TIF01          | <0.1 | 3.02             | 0.19                           | 83.09                          | 0.778 | 0.77 | 0.19 | 0.03              | 0.01             | 0.002            | 0.18                          | 11.56 | 99.8  |
| 18TIF20          | <0.1 | 3.09             | 0.47                           | 80.13                          | 1.205 | 0.95 | 0.49 | 0.04              | 0.01             | 0.003            | 0.36                          | 11.84 | 98.6  |
| 18TIF05          | <0.1 | 2.36             | 0.05                           | 84.97                          | 0.386 | 0.78 | 0.40 | 0.03              | <0.01            | <0.001           | 0.24                          | 11.52 | 100.7 |
| <u>Plateaux</u>  |      |                  |                                |                                |       |      |      |                   |                  |                  |                               |       |       |
| 15PL02           | <0.1 | 2.45             | 0.09                           | 83.07                          | 0.229 | 0.77 | 0.55 | 0.03              | <0.01            | <0.001           | 0.19                          | 11.74 | 99.2  |
| 18PL02B          | <0.1 | 2.72             | 0.44                           | 83.36                          | 0.335 | 0.93 | 0.17 | 0.04              | <0.01            | 0.002            | 0.28                          | 11.86 | 100.1 |
| 18PL07           | <0.1 | 2.24             | <0.01                          | 84.80                          | 0.276 | 0.71 | 0.26 | 0.04              | <0.01            | <0.001           | 0.19                          | 11.69 | 100.2 |
| 18PL25           | <0.1 | 1.87             | <0.01                          | 85.32                          | 0.079 | 0.70 | 0.29 | 0.05              | <0.01            | <0.001           | 0.11                          | 10.82 | 99.3  |
| 18PL27           | <0.1 | 2.18             | <0.01                          | 85.26                          | 0.176 | 0.71 | 0.17 | 0.02              | <0.01            | <0.001           | 0.08                          | 11.48 | 100.1 |

**Table S3.** Results of geochemical analyses for rare earth elements (in ppm).

| Sample number    | La   | Ce   | Pr   | Nd   | Sm   | Eu    | Gd   | Tb   | Dy   | Ho   | Er   | Tm    | Yb   | Lu    |
|------------------|------|------|------|------|------|-------|------|------|------|------|------|-------|------|-------|
| D.L.             | 0.05 | 0.05 | 0.01 | 0.05 | 0.01 | 0.005 | 0.01 | 0.01 | 0.01 | 0.01 | 0.01 | 0.005 | 0.01 | 0.002 |
| <u>Far West</u>  |      |      |      |      |      |       |      |      |      |      |      |       |      |       |
| 18FAR02          | 2.7  | 3.3  | 0.5  | 1.9  | 0.4  | 0.09  | 0.4  | <0.1 | 0.3  | <0.1 | 0.2  | <0.01 | 0.1  | 0.02  |
| 18FAR02A         | 2.3  | 2.8  | 0.3  | 1.1  | 0.2  | 0.06  | 0.3  | <0.1 | 0.3  | <0.1 | 0.2  | <0.01 | 0.2  | 0.02  |
| 18FAR02C         | 1.5  | 2.0  | 0.2  | 0.7  | 0.1  | <0.01 | 0.1  | <0.1 | 0.1  | <0.1 | <0.1 | <0.01 | <0.1 | 0.01  |
| 18FAR07X         | 2.6  | 3.0  | 0.3  | 1.2  | 0.2  | 0.05  | 0.3  | <0.1 | 0.3  | <0.1 | 0.2  | <0.01 | 0.2  | 0.03  |
| <u>Tifersine</u> |      |      |      |      |      |       |      |      |      |      |      |       |      |       |
| 18TIF01          | 2.2  | 2.4  | 0.3  | 1.1  | 0.2  | 0.05  | 0.2  | <0.1 | 0.2  | <0.1 | 0.1  | <0.01 | <0.1 | 0.01  |
| 18TIF20          | 6.7  | 6.3  | 0.9  | 3.0  | 0.5  | 0.13  | 0.6  | 0.1  | 0.6  | 0.1  | 0.4  | 0.07  | 0.5  | 0.08  |
| 18TIF05          | 1.6  | 2.1  | 0.3  | 1.1  | 0.2  | 0.06  | 0.3  | <0.1 | 0.2  | <0.1 | 0.1  | <0.01 | <0.1 | 0.01  |
| <u>Plateaux</u>  |      |      |      |      |      |       |      |      |      |      |      |       |      |       |
| 15PL02           | 1.3  | 2.0  | 0.2  | 1.0  | 0.2  | 0.05  | 0.3  | <0.1 | 0.2  | <0.1 | 0.1  | <0.01 | 0.1  | 0.02  |
| 18PL02B          | 2.1  | 5.3  | 0.5  | 1.8  | 0.4  | 0.09  | 0.5  | <0.1 | 0.4  | <0.1 | 0.2  | <0.01 | 0.2  | 0.04  |
| 18PL07           | 1.6  | 1.2  | 0.2  | 0.8  | 0.1  | <0.01 | 0.2  | <0.1 | 0.2  | <0.1 | <0.1 | <0.01 | <0.1 | 0.01  |
| 18PL25           | 0.5  | 0.5  | 0.1  | 0.3  | <0.1 | <0.01 | <0.1 | <0.1 | <0.1 | <0.1 | <0.1 | <0.01 | <0.1 | <0.01 |
| 18PL27           | 1.0  | 1.0  | 0.1  | 0.5  | 0.1  | <0.01 | 0.1  | <0.1 | 0.1  | <0.1 | <0.1 | <0.01 | <0.1 | <0.01 |

**Table S4.** Results of geochemical analyses for minor elements (in ppm).

| Sample number    | Sr | Cs   | Rb | Ba  | U    | Th    | Ta    | Nb   | Y    | Zr | Hf   | Be | Sc | V   | Cr  | W    | Mo  | Sn | Bi   | Tl   | As   | Sb  | Ag   | Pb  | Zn  | In   | Cu  | Co | Ni  | Ga | Ge  |
|------------------|----|------|----|-----|------|-------|-------|------|------|----|------|----|----|-----|-----|------|-----|----|------|------|------|-----|------|-----|-----|------|-----|----|-----|----|-----|
| D.L.             | 2  | 0.1  | 1  | 2   | 0.01 | 0.05  | 0.01  | 0.2  | 0.5  | 1  | 0.1  | 1  | 1  | 5   | 20  | 0.5  | 2   | 1  | 0.1  | 0.05 | 5    | 0.2 | 0.5  | 5   | 30  | 0.1  | 10  | 1  | 20  | 1  | 0.5 |
| <u>Far West</u>  |    |      |    |     |      |       |       |      |      |    |      |    |    |     |     |      |     |    |      |      |      |     |      |     |     |      |     |    |     |    |     |
| 18FAR02          | 19 | <0.1 | <1 | 28  | 9.5  | <0.05 | <0.01 | <0.2 | <0.5 | <1 | <0.1 | 7  | <1 | 391 | <20 | <0.5 | 140 | <1 | <0.1 | 0.3  | 859  | 1.5 | <0.5 | 79  | 270 | <0.1 | 300 | 26 | <20 | 10 | 4   |
| 18FAR02A         | 21 | <0.1 | <1 | 68  | 12.2 | <0.05 | <0.01 | <0.2 | <0.5 | <1 | <0.1 | 7  | <1 | 351 | <20 | <0.5 | 210 | <1 | <0.1 | 0.4  | 839  | 2.9 | <0.5 | 49  | 270 | <0.1 | 480 | 18 | <20 | 8  | 7   |
| 18FAR02C         | 27 | <0.1 | <1 | 276 | 3.2  | <0.05 | <0.01 | <0.2 | <0.5 | 2  | <0.1 | 3  | <1 | 347 | 30  | <0.5 | 130 | <1 | <0.1 | 0.7  | 767  | 4.0 | <0.5 | 123 | 150 | <0.1 | 130 | 19 | <20 | 4  | 9   |
| 18FAR07X         | 21 | <0.1 | <1 | 86  | 16.5 | <0.05 | <0.01 | <0.2 | <0.5 | <1 | <0.1 | 9  | <1 | 376 | <20 | <0.5 | 240 | <1 | <0.1 | 0.3  | 898  | 2.6 | <0.5 | 67  | 250 | <0.1 | 510 | 20 | 20  | 11 | 7   |
| <u>Tifersine</u> |    |      |    |     |      |       |       |      |      |    |      |    |    |     |     |      |     |    |      |      |      |     |      |     |     |      |     |    |     |    |     |
| 18TIF01          | 38 | <0.1 | <1 | 329 | 11.4 | <0.05 | <0.01 | <0.2 | <0.5 | <1 | <0.1 | 6  | <1 | 403 | <20 | <0.5 | 130 | <1 | <0.1 | 0.9  | 936  | 3.4 | <0.5 | 452 | 380 | <0.1 | 520 | 24 | <20 | 8  | 6   |
| 18TIF20          | 46 | <0.1 | <1 | 302 | 16.6 | <0.05 | <0.01 | <0.2 | <0.5 | 3  | <0.1 | 8  | 1  | 684 | 80  | <0.5 | 230 | <1 | <0.1 | 2.0  | 2600 | 4.0 | <0.5 | 712 | 410 | <0.1 | 660 | 41 | 20  | 12 | 6   |
| 18TIF05          | 20 | <0.1 | <1 | 71  | 11.7 | <0.05 | <0.01 | <0.2 | <0.5 | <1 | <0.1 | 8  | <1 | 519 | <20 | <0.5 | 270 | <1 | <0.1 | 0.3  | 1060 | 2.5 | <0.5 | 437 | 260 | <0.1 | 330 | 14 | 20  | 9  | 5   |
| <u>Plateaux</u>  |    |      |    |     |      |       |       |      |      |    |      |    |    |     |     |      |     |    |      |      |      |     |      |     |     |      |     |    |     |    |     |
| 15PL02           | 17 | <0.1 | <1 | 14  | 7.9  | <0.05 | <0.01 | <0.2 | <0.5 | <1 | <0.1 | 7  | <1 | 416 | <20 | 1.0  | 230 | <1 | <0.1 | <0.1 | 853  | 1.5 | <0.5 | 47  | 230 | <0.1 | 170 | 14 | <20 | 7  | 4   |
| 18PL02B          | 19 | <0.1 | <1 | 13  | 9.5  | <0.05 | <0.01 | <0.2 | <0.5 | <1 | <0.1 | 8  | <1 | 457 | <20 | <0.5 | 270 | 1  | <0.1 | 0.3  | 1010 | 2.2 | <0.5 | 284 | 370 | <0.1 | 300 | 15 | 20  | 14 | 4   |
| 18PL07           | 17 | <0.1 | <1 | 15  | 10.3 | <0.05 | <0.01 | <0.2 | <0.5 | <1 | <0.1 | 9  | <1 | 744 | <20 | <0.5 | 230 | <1 | <0.1 | <0.1 | 856  | 4.0 | <0.5 | 33  | 200 | <0.1 | 190 | 15 | 30  | 7  | 7   |
| 18PL25           | 12 | <0.1 | <1 | 31  | 1.6  | <0.05 | <0.01 | <0.2 | <0.5 | <1 | <0.1 | 3  | <1 | 66  | <20 | <0.5 | 240 | <1 | <0.1 | <0.1 | 402  | 1.7 | <0.5 | 34  | 80  | <0.1 | 10  | 6  | 20  | 2  | 6   |
| 18PL27           | 13 | <0.1 | <1 | 8   | 9.0  | <0.05 | <0.01 | <0.2 | <0.5 | <1 | <0.1 | 6  | <1 | 536 | <20 | <0.5 | 160 | <1 | <0.1 | <0.1 | 945  | 4.7 | <0.5 | 27  | 160 | <0.1 | 160 | 12 | 30  | 6  | 6   |

**Table S5.** Oxygen and hydrogen isotopic compositions of Imini goethite.

| Sample number    | H <sub>2</sub> O<br>(wt%) | δD <sub>VSMOW</sub><br>(‰) | δ <sup>18</sup> O <sub>VSMOW</sub><br>(‰) |
|------------------|---------------------------|----------------------------|-------------------------------------------|
| <u>Far West</u>  |                           |                            |                                           |
| 18FAR02          | 10.48                     | -167                       | 5.31                                      |
| 18FAR02A         | 11.03                     | -170                       | 11.09                                     |
| <u>Tifersine</u> |                           |                            |                                           |
| 18TIF01          | 11.02                     | -172                       | 3.39                                      |
| 18TIF20          | 11.08                     | -159                       | 3.07                                      |
| <u>Plateaux</u>  |                           |                            |                                           |
| 15PL02           | 11.06                     | -164                       | 4.35                                      |
| 18PL02B          | 11.35                     | -156                       | 6.03                                      |
| 18PL07           | 11.03                     | -168                       | 3.19                                      |
| 18PL25           | 10.56                     | -148                       | 4.98                                      |

**Table S6.** Imini goethite (U-Th)/He data.

| Sample           | <sup>4</sup> He          | ± s                     | We<br>igh<br>t | <sup>238</sup> U | <sup>232</sup> Th | <sup>147</sup> Sm | <sup>4</sup> He | ± s        | <sup>238</sup> U | <sup>232</sup> Th | <sup>147</sup> Sm | eU    | GHe age | ±    |
|------------------|--------------------------|-------------------------|----------------|------------------|-------------------|-------------------|-----------------|------------|------------------|-------------------|-------------------|-------|---------|------|
| name             | (ccSTP)                  | (ccSTP)                 | (μg<br>)       | (ng)             | (ng)              | (ng)              | (nccSTP/g)      | (nccSTP/g) | (ppm)            | (ppm)             | (ppm)             | (ppm) | (Ma)    | (Ma) |
| <u>Far West</u>  |                          |                         |                |                  |                   |                   |                 |            |                  |                   |                   |       |         |      |
| 18FAR02AA-1      | 1.16 × 10 <sup>-9</sup>  | 1.2 × 10 <sup>-11</sup> | 15             | 0.13             | 0.014             | 0.002             | 77,242          | 1159       | 8.6              | 0.9               | 0.15              | 9     | 72.1    | 3.6  |
| 18FAR02AA-2      | 1.85 × 10 <sup>-9</sup>  | 1.9 × 10 <sup>-11</sup> | 26             | 0.20             | 0.008             | 0.001             | 71,171          | 1068       | 7.9              | 0.3               | 0.03              | 8     | 73.5    | 3.7  |
| 18FAR02AA-3      | 9.33 × 10 <sup>-10</sup> | 9.3 × 10 <sup>-12</sup> | 13             | 0.11             | 0.004             | 0.001             | 71,783          | 1077       | 8.4              | 0.3               | 0.05              | 8     | 69.8    | 3.5  |
| 18FAR02AB-1      | 2.58 × 10 <sup>-9</sup>  | 2.6 × 10 <sup>-11</sup> | 22             | 0.23             | 0.006             | 0.001             | 117,195         | 1758       | 10.4             | 0.3               | 0.04              | 10    | 91.9    | 4.6  |
| 18FAR02AB-2      | 1.93 × 10 <sup>-9</sup>  | 1.9 × 10 <sup>-11</sup> | 14             | 0.18             | 0.005             | 0.001             | 138,036         | 2071       | 12.8             | 0.4               | 0.07              | 13    | 88.0    | 4.4  |
| 18FAR02AB-3      | 1.53 × 10 <sup>-9</sup>  | 1.5 × 10 <sup>-11</sup> | 11             | 0.14             | 0.005             | 0.002             | 139,125         | 2087       | 12.8             | 0.4               | 0.14              | 13    | 88.6    | 4.4  |
| 18FAR02AC-1      | 2.19 × 10 <sup>-9</sup>  | 2.2 × 10 <sup>-11</sup> | 15             | 0.19             | 0.002             | 0.000             | 146,249         | 2194       | 13.0             | 0.2               | 0.03              | 13    | 92.1    | 4.6  |
| 18FAR02AC-2      | 1.39 × 10 <sup>-9</sup>  | 1.4 × 10 <sup>-11</sup> | 9              | 0.13             | 0.002             | 0.001             | 154,243         | 2314       | 13.9             | 0.3               | 0.06              | 14    | 90.7    | 4.5  |
| 18FAR02AC-3      | 1.85 × 10 <sup>-9</sup>  | 1.8 × 10 <sup>-11</sup> | 13             | 0.16             | 0.011             | 0.001             | 142,102         | 2132       | 12.4             | 0.8               | 0.08              | 13    | 92.7    | 4.6  |
| <u>Tifersine</u> |                          |                         |                |                  |                   |                   |                 |            |                  |                   |                   |       |         |      |
| 18TIF01A-1       | 5.15 × 10 <sup>-10</sup> | 5.2 × 10 <sup>-12</sup> | 9              | 0.05             | 0.022             | 0.003             | 57,241          | 859        | 5.5              | 2.4               | 0.31              | 6     | 77.6    | 3.9  |
| 18TIF01A-2       | 8.12 × 10 <sup>-10</sup> | 8.1 × 10 <sup>-12</sup> | 11             | 0.08             | 0.014             | 0.003             | 73,814          | 1107       | 7.3              | 1.2               | 0.26              | 8     | 80.0    | 4.0  |
| 18TIF01A-3       | 2.63 × 10 <sup>-9</sup>  | 2.6 × 10 <sup>-11</sup> | 45             | 0.25             | 0.005             | 0.001             | 58,542          | 878        | 5.5              | 0.1               | 0.03              | 6     | 87.0    | 4.4  |
| 18TIF01B-2       | 1.67 × 10 <sup>-9</sup>  | 1.7 × 10 <sup>-11</sup> | 16             | 0.16             | 0.006             | 0.001             | 104,327         | 1565       | 10.2             | 0.4               | 0.06              | 10    | 83.3    | 4.2  |
| 18TIF01C-1       | 1.88 × 10 <sup>-9</sup>  | 1.9 × 10 <sup>-11</sup> | 21             | 0.17             | 0.003             | 0.002             | 89,457          | 1342       | 8.2              | 0.1               | 0.09              | 8     | 89.4    | 4.5  |
| 18TIF01C-2       | 1.67 × 10 <sup>-9</sup>  | 1.7 × 10 <sup>-11</sup> | 17             | 0.15             | 0.008             | 0.001             | 98,022          | 1470       | 8.9              | 0.4               | 0.07              | 9     | 89.5    | 4.5  |
| 18TIF01C-3       | 1.54 × 10 <sup>-9</sup>  | 1.5 × 10 <sup>-11</sup> | 17             | 0.14             | 0.008             | 0.001             | 90,334          | 1355       | 8.0              | 0.5               | 0.07              | 8     | 91.4    | 4.6  |
| <u>Plateaux</u>  |                          |                         |                |                  |                   |                   |                 |            |                  |                   |                   |       |         |      |
| 18PL07A-1        | 4.76 × 10 <sup>-9</sup>  | 4.8 × 10 <sup>-11</sup> | 39             | 0.45             | 0.006             | 0.002             | 121,972         | 1830       | 11.6             | 0.2               | 0.06              | 12    | 86.1    | 4.3  |
| 18PL07A-2        | 8.30 × 10 <sup>-9</sup>  | 8.3 × 10 <sup>-11</sup> | 71             | 0.83             | 0.001             | 0.002             | 116,948         | 1754       | 11.7             | 0.0               | 0.03              | 12    | 82.0    | 4.1  |
| 18PL07A-3        | 8.14 × 10 <sup>-9</sup>  | 8.1 × 10 <sup>-11</sup> | 69             | 0.81             | 0.004             | 0.002             | 117,972         | 1770       | 11.7             | 0.1               | 0.03              | 12    | 82.7    | 4.1  |
| 18PL07B-1        | 3.17 × 10 <sup>-9</sup>  | 3.2 × 10 <sup>-11</sup> | 31             | 0.33             | 0.010             | 0.001             | 102,228         | 1533       | 10.6             | 0.3               | 0.03              | 11    | 78.8    | 3.9  |
| 18PL07B-2        | 2.04 × 10 <sup>-9</sup>  | 2.0 × 10 <sup>-11</sup> | 18             | 0.20             | 0.002             | 0.001             | 113,365         | 1700       | 11.0             | 0.1               | 0.03              | 11    | 84.5    | 4.2  |
| 18PL07B-3        | 1.91 × 10 <sup>-9</sup>  | 1.9 × 10 <sup>-11</sup> | 16             | 0.19             | 0.006             | 0.001             | 119,433         | 1792       | 11.8             | 0.4               | 0.05              | 12    | 83.0    | 4.2  |
| 18PL07C-1        | 2.46 × 10 <sup>-9</sup>  | 2.5 × 10 <sup>-11</sup> | 25             | 0.24             | 0.003             | 0.001             | 98,375          | 1476       | 9.5              | 0.1               | 0.03              | 10    | 83.0    | 4.2  |
| 18PL07C-2        | 3.10 × 10 <sup>-9</sup>  | 3.1 × 10 <sup>-11</sup> | 31             | 0.31             | 0.007             | 0.001             | 99,862          | 1498       | 9.9              | 0.2               | 0.04              | 10    | 83.0    | 4.2  |
| 18PL07C-3        | 2.48 × 10 <sup>-9</sup>  | 2.5 × 10 <sup>-11</sup> | 24             | 0.24             | 0.004             | 0.001             | 103,500         | 1552       | 10.1             | 0.2               | 0.03              | 10    | 84.0    | 4.2  |
| 18PL07D-1        | 4.41 × 10 <sup>-9</sup>  | 4.4 × 10 <sup>-11</sup> | 41             | 0.45             | 0.003             | 0.001             | 107,668         | 1615       | 10.9             | 0.1               | 0.02              | 11    | 81.0    | 4.1  |
| 18PL07D-3        | 5.85 × 10 <sup>-9</sup>  | 5.9 × 10 <sup>-11</sup> | 57             | 0.60             | 0.010             | 0.002             | 102,702         | 1541       | 10.6             | 0.2               | 0.04              | 11    | 79.3    | 4.0  |
| 18PL07E-1        | 1.54 × 10 <sup>-9</sup>  | 1.5 × 10 <sup>-11</sup> | 15             | 0.15             | 0.004             | 0.001             | 102,464         | 1537       | 9.9              | 0.3               | 0.06              | 10    | 84.5    | 4.2  |
| 18PL07E-2        | 3.79 × 10 <sup>-9</sup>  | 3.8 × 10 <sup>-11</sup> | 36             | 0.38             | 0.005             | 0.002             | 105,215         | 1578       | 10.6             | 0.1               | 0.05              | 11    | 81.4    | 4.1  |
| 18PL07E-3        | 2.59 × 10 <sup>-9</sup>  | 2.6 × 10 <sup>-11</sup> | 25             | 0.26             | 0.008             | 0.001             | 103,594         | 1554       | 10.5             | 0.3               | 0.05              | 11    | 80.6    | 4.0  |
| 18PL07F-1        | 3.25 × 10 <sup>-9</sup>  | 3.2 × 10 <sup>-11</sup> | 31             | 0.31             | 0.006             | 0.002             | 104,809         | 1572       | 10.0             | 0.2               | 0.07              | 10    | 85.9    | 4.3  |

|                  |                        |                       |     |      |       |       |         |      |      |     |      |    |      |     |
|------------------|------------------------|-----------------------|-----|------|-------|-------|---------|------|------|-----|------|----|------|-----|
| 18PL07F-2        | $1.66 \times 10^{-9}$  | $1.7 \times 10^{-11}$ | 16  | 0.16 | 0.001 | 0.000 | 103,881 | 1558 | 9.9  | 0.1 | 0.03 | 10 | 86.0 | 4.3 |
| 18PL07F-3        | $2.01 \times 10^{-9}$  | $2.0 \times 10^{-11}$ | 18  | 0.20 | 0.008 | 0.001 | 111,496 | 1672 | 11.0 | 0.5 | 0.06 | 11 | 82.4 | 4.1 |
| <u>Far West</u>  |                        |                       |     |      |       |       |         |      |      |     |      |    |      |     |
| 18FAR02-1        | $8.87 \times 10^{-10}$ | $8.9 \times 10^{-12}$ | 15  | 0.11 | 0.005 | 0.002 | 59,111  | 887  | 7.6  | 0.3 | 0.11 | 8  | 63.5 | 3.2 |
| 18FAR02-2        | $7.54 \times 10^{-10}$ | $7.5 \times 10^{-12}$ | 26  | 0.10 | 0.006 | 0.002 | 28,999  | 435  | 3.9  | 0.2 | 0.07 | 4  | 60.5 | 3.0 |
| 18FAR02-3        | $4.73 \times 10^{-10}$ | $4.7 \times 10^{-12}$ | 13  | 0.06 | 0.025 | 0.004 | 36,377  | 546  | 4.9  | 1.9 | 0.29 | 5  | 55.9 | 2.8 |
| 18FAR02-4        | $9.87 \times 10^{-9}$  | $9.9 \times 10^{-12}$ | 22  | 0.12 | 0.006 | 0.001 | 44,849  | 673  | 5.5  | 0.3 | 0.06 | 6  | 66.3 | 3.3 |
| 18FAR02-5        | $1.46 \times 10^{-9}$  | $1.5 \times 10^{-11}$ | 14  | 0.19 | 0.008 | 0.002 | 104,466 | 1567 | 13.7 | 0.6 | 0.14 | 14 | 61.2 | 3.1 |
| <u>Tifersine</u> |                        |                       |     |      |       |       |         |      |      |     |      |    |      |     |
| 18TIF20-1        | $1.28 \times 10^{-9}$  | $1.3 \times 10^{-11}$ | 11  | 0.22 | 0.010 | 0.002 | 116,751 | 1751 | 20.5 | 0.9 | 0.14 | 21 | 46.5 | 2.3 |
| 18TIF20-2        | $5.17 \times 10^{-9}$  | $5.2 \times 10^{-11}$ | 38  | 0.80 | 0.005 | 0.002 | 135,938 | 2039 | 21.1 | 0.1 | 0.06 | 21 | 53.1 | 2.7 |
| 18TIF20-3        | $1.52 \times 10^{-9}$  | $1.5 \times 10^{-11}$ | 12  | 0.20 | 0.007 | 0.002 | 126,592 | 1899 | 16.6 | 0.6 | 0.14 | 17 | 62.3 | 3.1 |
| 18TIF20-4        | $1.16 \times 10^{-8}$  | $1.2 \times 10^{-10}$ | 78  | 1.70 | 0.014 | 0.006 | 148,619 | 2229 | 21.8 | 0.2 | 0.08 | 22 | 56.1 | 2.8 |
| 18TIF20-5        | $1.57 \times 10^{-9}$  | $1.6 \times 10^{-11}$ | 9   | 0.21 | 0.049 | 0.009 | 174,474 | 2617 | 23.4 | 5.4 | 0.98 | 25 | 58.2 | 2.9 |
| <u>Plateaux</u>  |                        |                       |     |      |       |       |         |      |      |     |      |    |      |     |
| 18PL25-1         | $8.60 \times 10^{-10}$ | $8.6 \times 10^{-12}$ | 37  | 0.12 | 0.033 | 0.003 | 23,254  | 349  | 3.2  | 0.9 | 0.08 | 3  | 56.1 | 2.8 |
| 18PL25-2         | $1.19 \times 10^{-9}$  | $1.2 \times 10^{-11}$ | 65  | 0.14 | 0.013 | 0.001 | 18,337  | 275  | 2.2  | 0.2 | 0.02 | 2  | 67.1 | 3.4 |
| 18PL25-3         | $4.44 \times 10^{-10}$ | $4.4 \times 10^{-12}$ | 17  | 0.05 | 0.019 | 0.003 | 26,102  | 392  | 3.1  | 1.1 | 0.17 | 3  | 64.0 | 3.2 |
| 18PL25-5         | $5.79 \times 10^{-10}$ | $5.8 \times 10^{-12}$ | 46  | 0.06 | 0.004 | 0.001 | 12,584  | 189  | 1.3  | 0.1 | 0.02 | 1  | 78.2 | 3.9 |
| <u>Plateaux</u>  |                        |                       |     |      |       |       |         |      |      |     |      |    |      |     |
| 15PL02-1         | $1.05 \times 10^{-8}$  | $1.1 \times 10^{-10}$ | 200 | 1.29 | 0.007 | n.a.  | 52,666  | 790  | 6.5  | 0.0 | n.a. | 6  | 66.5 | 3.3 |
| 15PL02-2         | $5.87 \times 10^{-9}$  | $5.9 \times 10^{-11}$ | 100 | 0.62 | 0.008 | n.a.  | 58,665  | 880  | 6.2  | 0.1 | n.a. | 6  | 77.5 | 3.9 |
| 15PL02-3         | $1.64 \times 10^{-8}$  | $1.6 \times 10^{-10}$ | 260 | 1.90 | 0.008 | n.a.  | 63,228  | 948  | 7.3  | 0.0 | n.a. | 7  | 71.1 | 3.6 |
| 15PL02-4         | $6.19 \times 10^{-8}$  | $6.3 \times 10^{-10}$ | 782 | 6.39 | 0.026 | 0.03  | 79,100  | 1186 | 8.2  | 0.0 | 0.04 | 8  | 79.1 | 4.0 |
| <u>Plateaux</u>  |                        |                       |     |      |       |       |         |      |      |     |      |    |      |     |
| 18PL02B-2        | $1.09 \times 10^{-8}$  | $1.1 \times 10^{-10}$ | 85  | 1.10 | 0.002 | 0.005 | 128,669 | 1930 | 13.0 | 0.0 | 0.06 | 13 | 81.2 | 4.1 |
| 18PL02B-3        | $6.16 \times 10^{-9}$  | $6.2 \times 10^{-11}$ | 57  | 0.63 | 0.009 | 0.003 | 108,154 | 1622 | 11.1 | 0.2 | 0.06 | 11 | 79.8 | 4.0 |
| 18PL02B-4        | $4.53 \times 10^{-9}$  | $4.5 \times 10^{-11}$ | 41  | 0.44 | 0.069 | 0.039 | 110,419 | 1656 | 10.7 | 1.7 | 0.94 | 11 | 81.8 | 4.1 |
| 18PL02B-5        | $3.55 \times 10^{-9}$  | $3.6 \times 10^{-11}$ | 32  | 0.36 | 0.142 | 0.016 | 110,999 | 1665 | 11.2 | 4.4 | 0.50 | 12 | 74.6 | 3.7 |

n.a. = not available.
